# Supplementary material
Source: publisher figshare collection journal article supplement (https://frontiersin.figshare.com/ndownloader/files/25307048)
Supplement: Supplementary file [file 25307048]

## **Supplementary file 3**

Isolation of rainbow trout lymphocyte subpopulations by flow cytometry

| <b>Table of Contents</b>                                                                                                                                                                          | <b>Page</b> |
|---------------------------------------------------------------------------------------------------------------------------------------------------------------------------------------------------|-------------|
| Introduction and general explanation of the file contents                                                                                                                                         | 2           |
| 3A: Establishment of a new monoclonal antibody<br>against rainbow trout CD8 $\alpha$                                                                                                              | 4           |
| 3B: Representative sortings of CD8 $\alpha^+$ versus CD8 $\alpha^-$<br>rainbow trout lymphocytes                                                                                                  | 6           |
| 3C: Representative sorting of CD4 $^-$ CD8 $^-$ (double negative,<br>DN), CD4 $^+$ CD8 $^+$ (double positive, DP), CD4 single<br>positive (SP) and CD8SP rainbow trout lymphocytes from<br>thymus | 8           |
| 3D: Representative sorting of CD4SP, CD8SP, IgMSP and<br>CD4 $^-$ CD8 $^-$ IgM $^-$ triple negative (TN) rainbow trout splenocytes                                                                | 10          |
| 3E: Percentages of CD4SP, CD8SP, IgMSP and TN cells<br>among rainbow trout spleen lymphocytes                                                                                                     | 11          |
| References used in this file                                                                                                                                                                      | 12          |

## Introduction and general explanation of the file contents.

Teleost fish lack lymph nodes [e.g. (1)], but they possess a bona fide spleen and thymus [e.g. (1-6)], while the head kidney (HK; pronephros) simultaneously is a hematopoietic organ and a secondary lymphoid organ [e.g. (4, 7, 8)]. It has also been shown that gills as the respiratory organ of teleosts [e.g. (4, 6)] and the intestine [e.g. (4, 9)] are mucosal organs that contain numerous lymphocytes. Therefore, in this study, rainbow trout leukocytes were isolated from the lymphoid tissues spleen, thymus and HK, and from the mucosal tissues gill and intestine.

There are several lines of evidence that indicate that teleost fish cytotoxic TCR $\alpha\beta$  T cells express CD8 $\alpha$  as known in mammals [e.g. (10-13)]. Whereas mammals have only one CD4 molecule, teleost fish have two quite diverged CD4-1 and CD4-2 molecules which in lymphocytes are mostly co-expressed [e.g. (14-17)]; both CD4-1 and CD4-2 show expression patterns and molecular features consistent with a CD4 marker function of helper and regulatory T cells as known in mammals [e.g. (14-21)]. Fish B cells do not undergo an immunoglobulin class switch thus lacking IgG, IgA and IgE, and the main B cell population expresses IgM [e.g. (22)].

In the present study, monoclonal antibodies (mAbs) against trout CD8 $\alpha$ , CD4-1, CD4-2 and IgM were used to label leukocytes that had been isolated by Percoll density gradient centrifugation, after which cells with lymphocyte features (FSC<sup>low</sup> and SSC<sup>low</sup> gated cells; described below as “lymphocytes”) were flow sorted into subpopulations depending on their labeling. To allow distinguishing usage of anti-CD8 $\alpha$  together with other mAbs, a new mAb was established against trout CD8 $\alpha$  possessing a different IgG isotype than the already available mAb 13.2D (10); this is explained in Supplementary file 3A. For CD4 labeling, a mixture containing both mAb 4.1.2 which recognizes trout CD4-1 and mAb 4.2.12 which recognizes trout CD4-2 (23) was used. For IgM labeling the mAb 1.14 was used (24). Doublets and dead cells were excluded by FSC-A/FSC-H gating and by propidium iodide (PI) or 4', 6-diamidino-2-phenylindole (DAPI) staining, respectively.

Details on the antibodies used for flow cytometry are:

### *Primary antibodies:*

- mAb 13.2D: anti-trout CD8 $\alpha$ , rat IgG2a isotype (10)
- mAb 7 $\alpha$ 8c: anti-trout CD8 $\alpha$ , rat IgG1 isotype (Supplementary file 3A)
- mAb 4.1.2: anti-trout CD4-1, rat IgG2a isotype (14)
- mAb 4.2.12: anti-trout CD4-2, rat IgG2b isotype (14)
- mAb 1.14: anti-trout IgM, mouse IgG1 isotype (24)

### *Fluorochrome-conjugated secondary antibodies:*

- anti-rat IgG Alexa Fluor 488 (Thermo Fischer Scientific)
- anti-rat IgG1-FITC (BD Bioscience)
- anti-rat IgG2a-PE (eBioscience)
- anti-rat IgG2a-eFluor 660 (eBioscience)
- anti-rat IgG2b-PE (eBioscience)
- anti-rat IgG2b-eFluor 660 (eBioscience)

anti-mouse IgG1-Brilliant Violet 421™ (Biolegend)

In the various experiments, different sets of the above listed antibodies were used for the flow sorting of lymphocyte subpopulations. The Supplementary files 3B-to-3E are representative results for the flow sorting used in the present study, concerning lymphocytes from different tissues and different antibody combinations.

Supplementary file 3B shows representative sorting results for lymphocytes of various tissues when using primary antibody anti-trout CD8 $\alpha$  (mAb 13.2D) plus secondary antibody anti-rat IgG Alexa Fluor 488. Two subpopulations were obtained, being CD8<sup>+</sup> and CD8<sup>-</sup> lymphocytes. This type of sorting was used for experiments of which results are shown in Supplementary file 5C.

Supplementary file 3C shows representative sorting results for lymphocytes of various tissues when using primary antibodies anti-trout CD8 $\alpha$  (mAb 7 $\alpha$ 8c), anti-trout CD4-1 (mAb 4.1.2), and anti-trout CD4-2 (mAb 4.2.12), plus secondary antibodies anti-rat IgG1-FITC, anti-rat IgG2a-PE and anti-rat IgG2b-PE. Four subpopulations were obtained from thymus, being CD4SP, CD8SP, CD4<sup>+</sup>CD8<sup>-</sup> (DN) and CD4<sup>+</sup>CD8<sup>+</sup> (DP) lymphocytes while three subpopulations were obtained from spleen and intestine, being CD4SP, CD8SP and DN. This type of sorting was used for experiments of which results are shown in main text Fig. 9, and in Supplementary files 5C(f), 5C(k), 5D and 5E.

Supplementary file 3D shows representative sorting results for lymphocytes of various tissues when using primary antibodies anti-trout CD8 $\alpha$  (mAb 7 $\alpha$ 8c), anti-trout CD4-1 (mAb 4.1.2), anti-trout CD4-2 (mAb 4.2.12), and anti-trout IgM (mAb 1.14), plus secondary antibodies anti-rat IgG1-FITC, anti-rat IgG2a-eFluor 660, anti-rat IgG2b-eFluor 660 and anti-mouse IgG1-Brilliant Violet 421™. Four subpopulations were obtained, being CD4SP (aka CD4<sup>+</sup>), CD8SP (aka CD8<sup>+</sup>), IgMSP (aka IgM<sup>+</sup>), and CD4<sup>-</sup>CD8<sup>-</sup>IgM<sup>-</sup> (TN) lymphocytes. This type of sorting was used for experiments of which results are shown in main text Fig. 11 and in Supplementary file 6C.

Supplementary file 3E summarizes the relative numbers of the CD8SP (aka CD8<sup>+</sup>), CD4SP (aka CD4<sup>+</sup>) IgMSP (aka IgM<sup>+</sup>), and CD4<sup>-</sup>CD8<sup>-</sup>IgM<sup>-</sup> (TN) cells among the spleen lymphocytes used for the experiments resulting in main text Fig. 11 (and Supplementary file 6C). This summary intends to help with the interpretation at the whole tissue level of the gene expression patterns observed within cell subpopulations.

*At a note:* Like in mammals, teleost lymphocytes can be distinguished from monocytes/macrophages and granulocytes by flow cytometry according to their scatter characteristics (FSC<sup>low</sup> and SSC<sup>low</sup>) as small non-granulated cells [e.g. (8, 10, 14)]. Cells within this population are referred to as “lymphocyte gate cells” or “morphological lymphocytes”, and often are simply called “lymphocytes” in the present paper. However, it should be mentioned that teleost thrombocytes are nucleated cells with similar scatter characteristics as lymphocytes [e.g. (25)] and thus be contained in the corresponding negative populations.

### Supplementary file 3A Establishment of a new mAb against rainbow trout CD8 $\alpha$ .

A new anti-trout CD8 $\alpha$  mAb 7 $\alpha$ 8c with another Ig isotype than the previously published anti-trout CD8 $\alpha$  mAb 13.2D (50) was established because its Ig isotype was more suitable for multicolor staining in combination with mAbs against other molecules.

(a) Flow cytometry analysis of HEK293T cells transfected for expression of HA-tagged trout CD8 $\alpha$  (HEK293T-CD8 $\alpha$ -HA) and parental HEK293T cells stained with anti-HA (upper plots) and anti-trout CD8 $\alpha$  7 $\alpha$ 8c mAb (lower plots). (b) Rainbow trout leukocytes from intestine were stained with anti-CD8 $\alpha$  7 $\alpha$ 8c mAb and FITC-conjugated goat anti-rat IgG, and sorted into 7 $\alpha$ 8c-negative (-) and 7 $\alpha$ 8c-positive (+) lymphocytes. RNA was extracted from both populations and analyzed by RT-PCR using specific primers for CD8 $\alpha$  (upper panel) and  $\beta$ -actin (lower panel). Distilled water served as a negative control. Numbers of cycles are provided on the right side of the figure.

(a) *Confirmation of 7 $\alpha$ 8c antibody specificity by flow cytometry analysis of HEK293T cells transfected for rainbow trout CD8 $\alpha$*

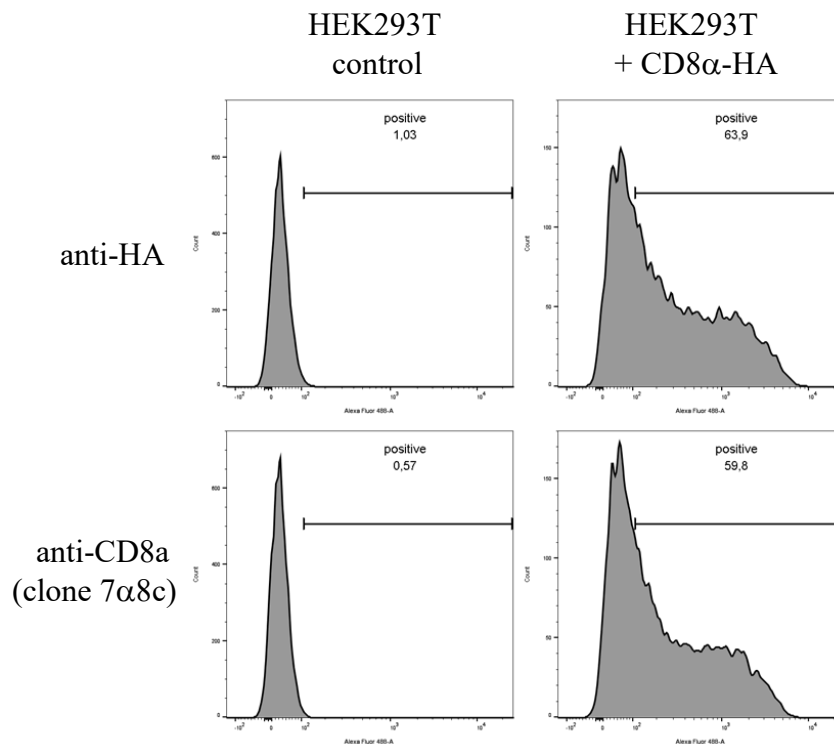

(Supplementary file 3A)

(b) Confirmation of 7 $\alpha$ 8c antibody specificity by semi-quantitative RT-PCR analysis of flow-sorted rainbow trout intestinal lymphocytes

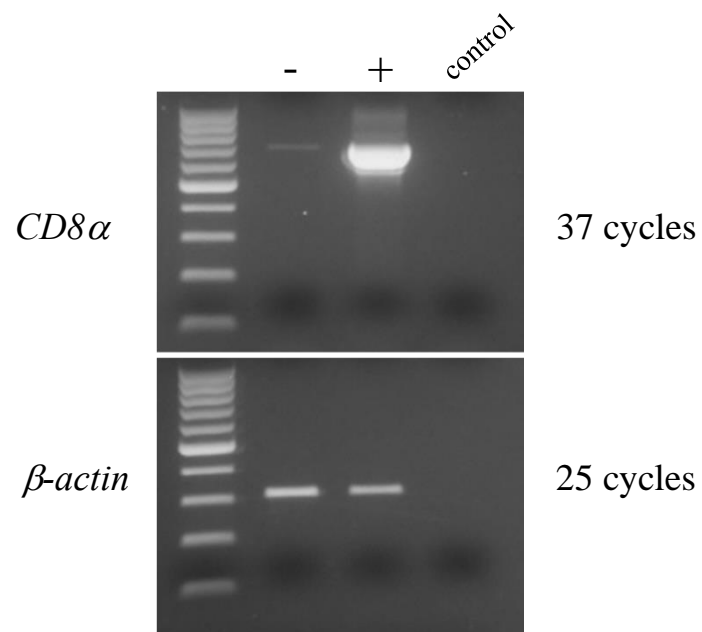

**Supplementary file 3B** Representative sortings of  $CD8\alpha^+$  versus  $CD8\alpha^-$  rainbow trout lymphocytes.

Leukocytes from thymus (a), intestine (b), head kidney (c), spleen (d) and gill (e) were stained with anti- $CD8\alpha$  mAb. The X-axis depicts relative cell size (FSC; forward scatter) while the Y-axis represents fluorescent intensity with the anti- $CD8\alpha$  mAb. The Y-axis is set to a biexponential scale.  $FSC^{low}$  and  $SSC^{low}$  lymphocytes were gated and fluorescence intensities from unsorted leukocytes (Pre-sort; left panel), sorted  $CD8\alpha^-$  lymphocytes (Negative; middle panel) and sorted  $CD8\alpha^+$  lymphocytes (Positive; right panel) were plotted.  $CD8\alpha^+$  lymphocytes are depicted in the upper right quadrants while the  $CD8\alpha^-$  cells appear in the lower right quadrants, respectively. Data are from a single representative of at least two independent experiments. In each experiment, leukocytes from 4 - 6 clonal individual trout were pooled.

*(a) Rainbow trout thymocytes*

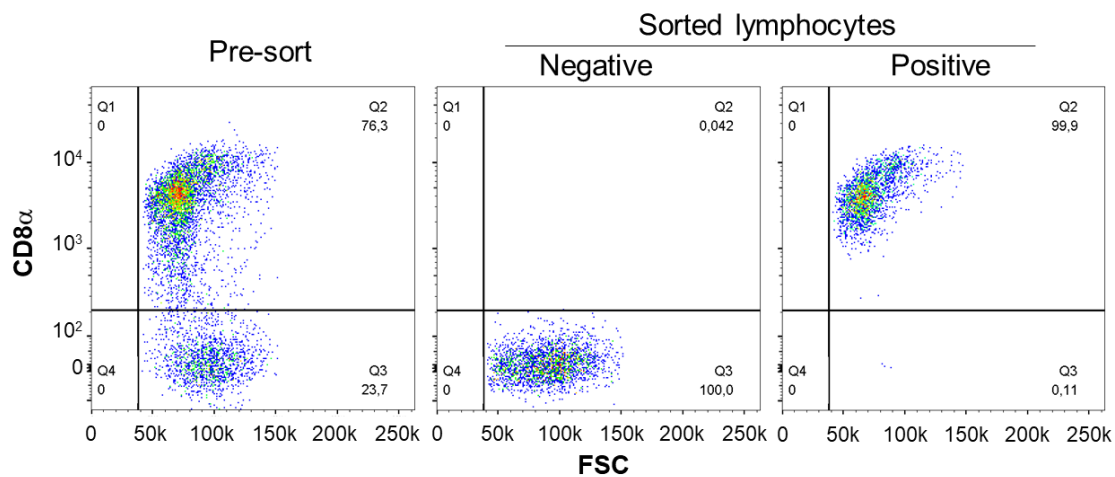

*(b) Rainbow trout intestine lymphocytes*

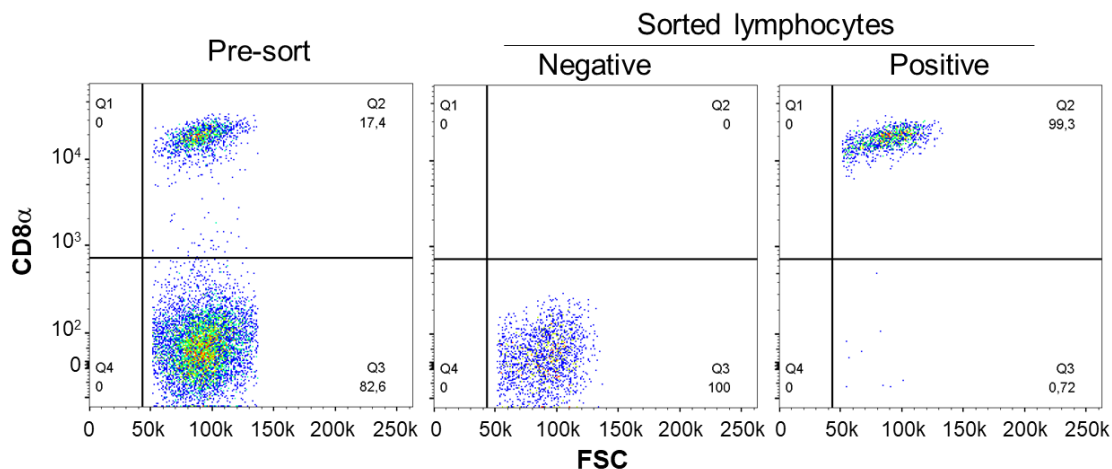

(Supplementary file 3B)

(c) Rainbow trout head kidney lymphocytes

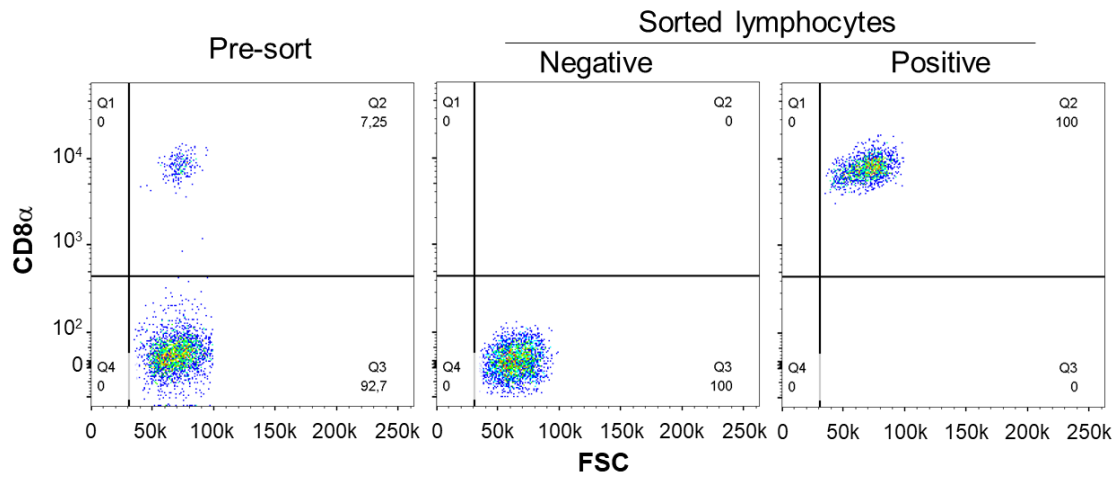

(d) Rainbow trout spleen lymphocytes

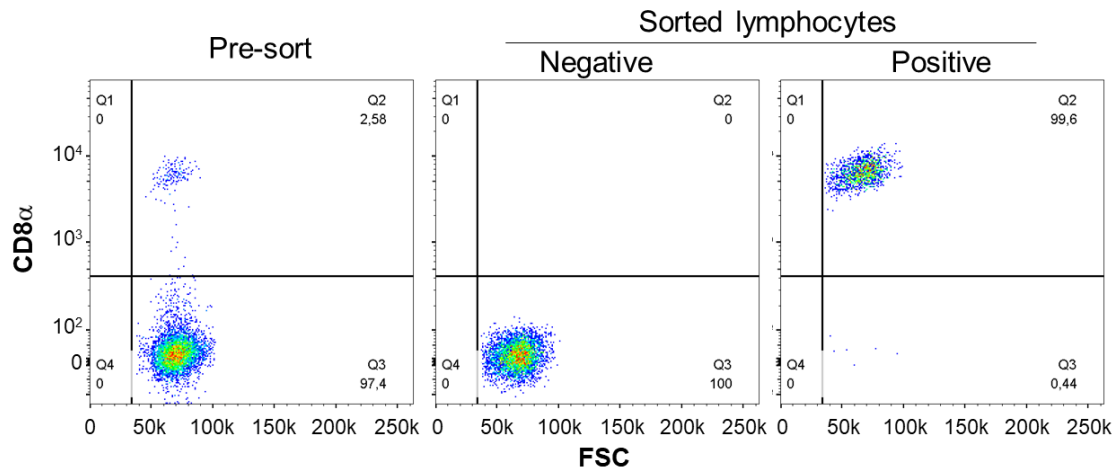

(e) Rainbow trout gill lymphocytes

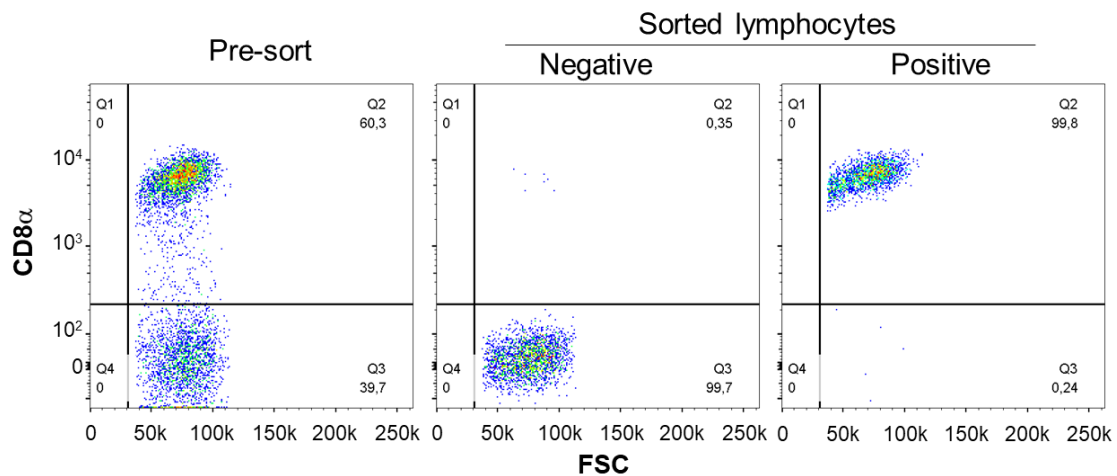

### Supplementary file 3C Representative sortings of DN, DP, CD4SP and CD8SP rainbow trout lymphocytes from thymus, intestine and spleen.

Leukocytes from thymus (a), intestine (b), and spleen (c) were stained with anti-CD8 $\alpha$ , anti-CD4-1 and anti-CD4-2 mAbs and sorted into the respective subpopulations. The X-axis depicts fluorescent intensity of staining with anti-CD8 $\alpha$  mAb while the Y-axis represents fluorescent intensity with the anti-CD4 mAbs. Both axes are set to a biexponential scale. FSC<sup>low</sup> and SSC<sup>low</sup> lymphocytes were gated and their fluorescence intensities were plotted as follows: (a) stainings of thymocytes prior to sorting (Pre-sort; left panel), sorted DN thymocytes (upper middle panel), sorted DP thymocytes (upper right panel), sorted CD8SP thymocytes (lower middle panel) and sorted CD4SP thymocytes (lower right panel). Figures (b) and (c) show stainings of lymphocytes prior to sorting (Pre-sort; far left panel), sorted DN lymphocytes (left panel), sorted CD8SP lymphocytes (CD8SP; right panel) and sorted CD4SP lymphocytes (far right panel). Data are from a single representative of 5 independent experiments. In each experiment, leukocytes from 6 - 8 clonal individual trout were pooled.

#### (a) Rainbow trout thymocytes

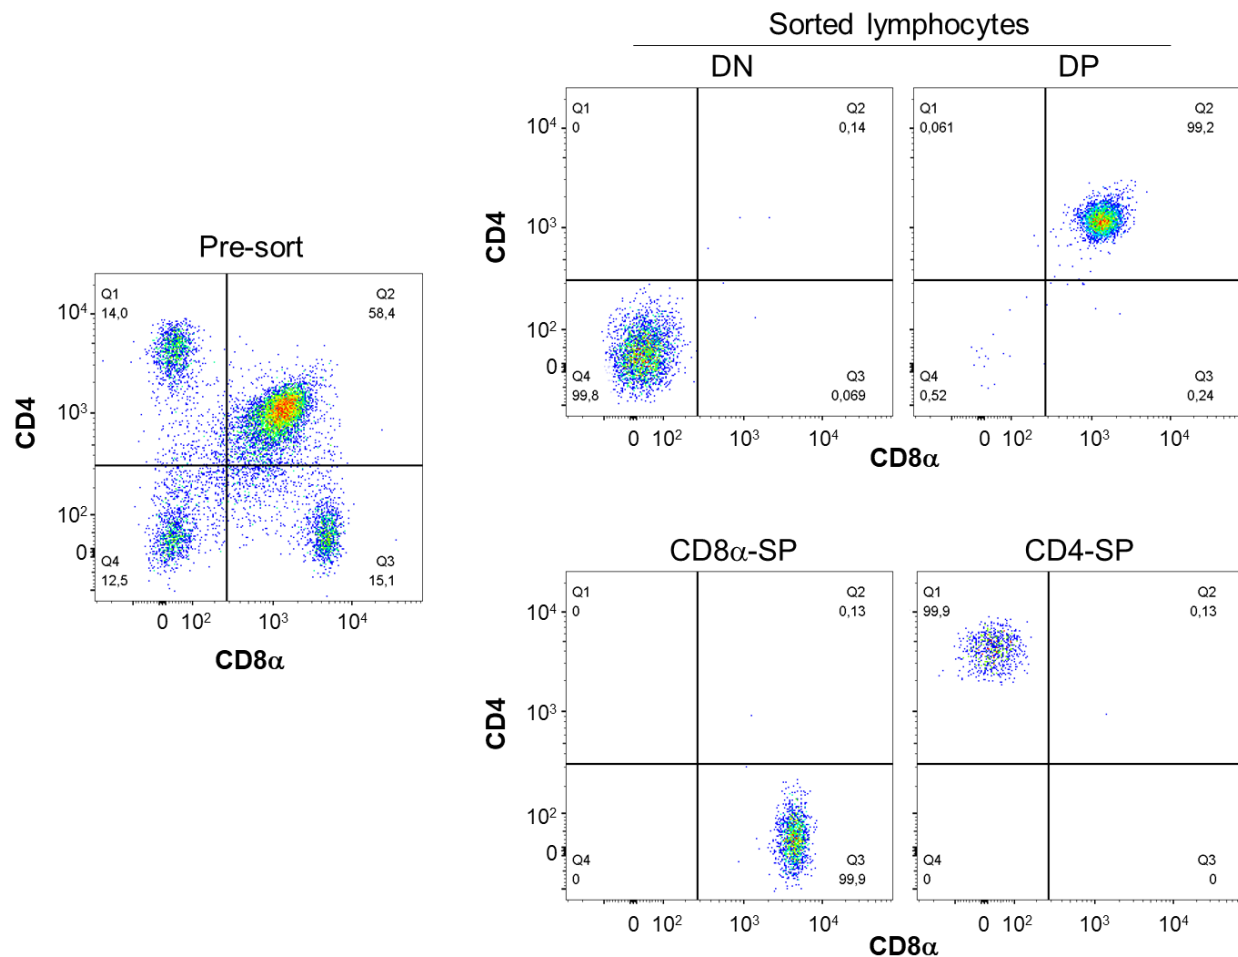



(Supplementary file 3C)

(b) *Rainbow trout intestine lymphocytes*

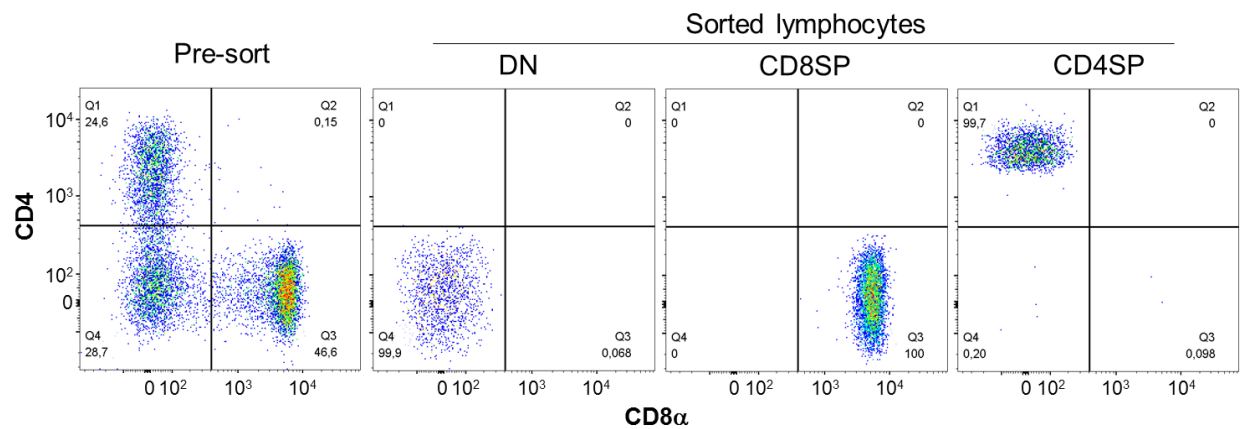

(c) *Rainbow trout spleen lymphocytes*

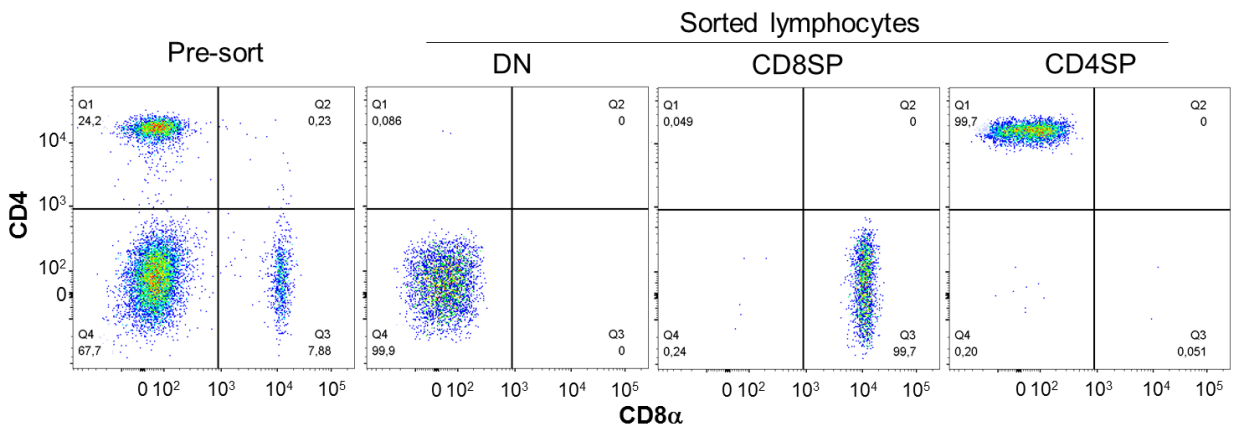

### Supplementary file 3D Representative sorting of CD4SP, CD8SP, IgMSP and TN (triple negative; CD4<sup>-</sup>CD8<sup>-</sup>IgM<sup>-</sup>) rainbow trout splenocytes.

Splenocytes were stained with anti-CD8 $\alpha$ , anti-CD4-1, anti-CD4-2 and anti-IgM mAbs and flow sorted. FSC<sup>low</sup> and SSC<sup>low</sup> lymphocytes were gated, and considered for further sorting steps. Representative dot plots show CD4 versus CD8 $\alpha$  (a), IgM versus CD8 $\alpha$  (b), and IgM versus CD4 (c). The fluorescence intensities of stainings prior to sorting (left Pre-sort panels) was plotted. CD4<sup>-</sup>CD8<sup>-</sup> double negative (DN) populations were further gated and used for sorting into IgM<sup>+</sup> and IgM<sup>-</sup> splenocytes. Fluorescence intensities of sorted cells are depicted in the right panels: TN splenocytes (far left panels), sorted CD4SP (left panels), sorted CD8SP splenocytes (right panels) and sorted IgMSP splenocytes (far right panels). Both axes are set to a biexponential scale. Data are from a single representative of 5 independent experiments. In each experiment, leukocytes from 8 individuals were pooled.

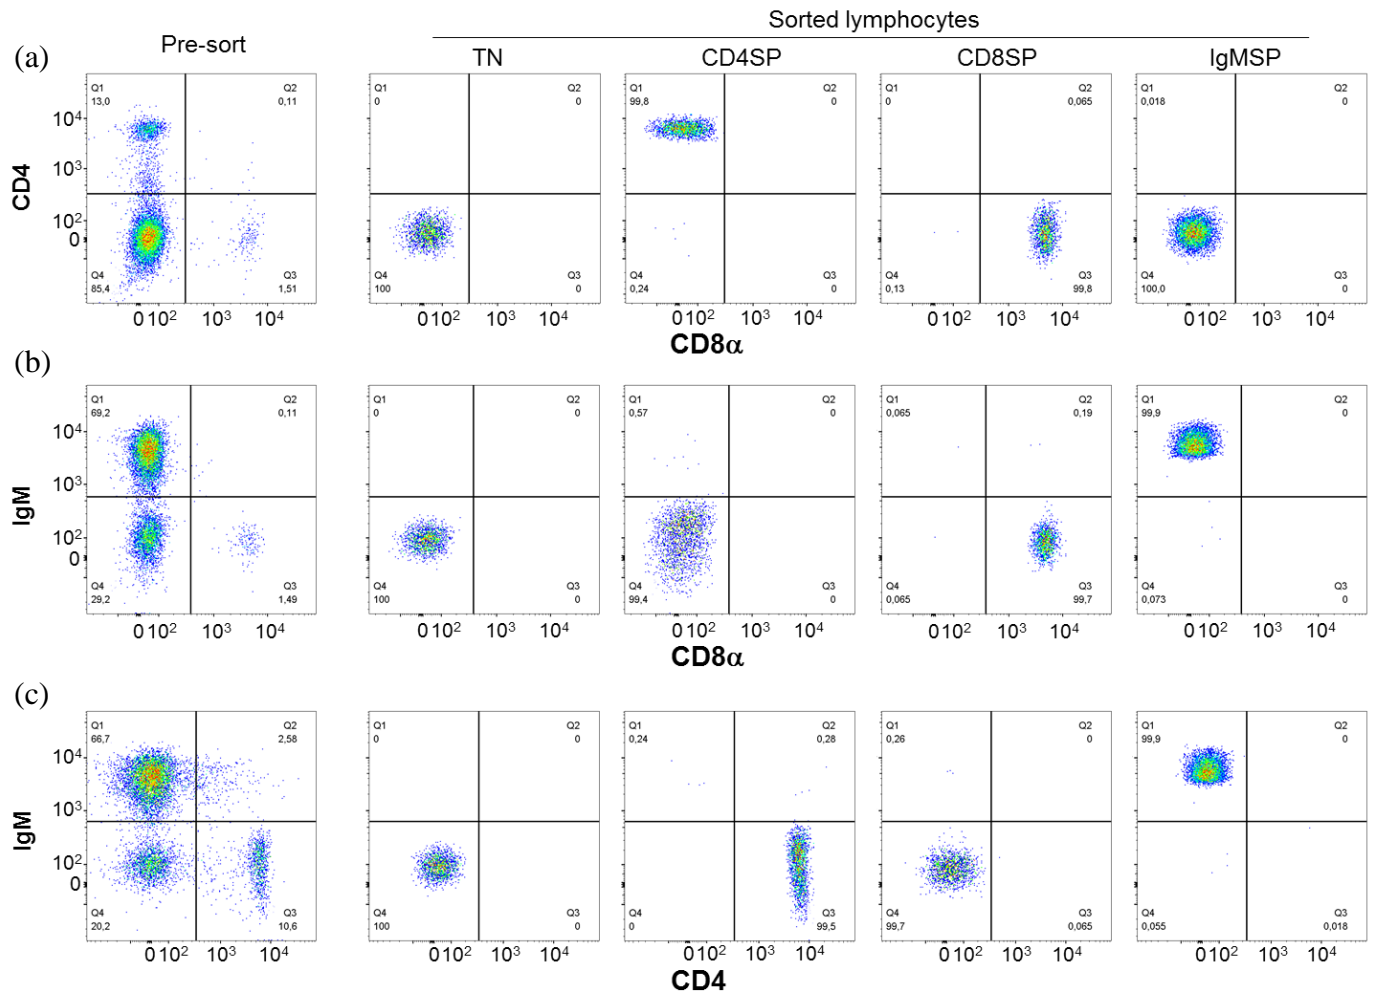

**Supplementary file 3E Percentages of CD4SP, CD8SP, IgMSP and TN cells among rainbow trout spleen lymphocytes.**

For the experiments of which the results are shown in main text Fig. 11, spleens of 8 individuals were pooled in four independent experiments. For one of those experiments, the sorting results into CD4SP, CD8SP, IgMSP and TN cell subpopulations are shown in Supplementary file 3D. The tables below summarize the percentages of subpopulation cells relative to spleen lymphocytes for each of the four experiments. Table (a) shows the raw data provided by the cell sorter, and Table (b) shows calculated percentages of IgM<sup>+</sup> and TN splenocytes, based on dividing the percentage of DN splenocytes according to the ratio of IgM<sup>+</sup> and IgM<sup>-</sup> splenocytes.

(a)

| % in lymphocyte gate | CD8SP | CD4SP | DN   | within DN |           |
|----------------------|-------|-------|------|-----------|-----------|
|                      |       |       |      | IgM+      | IgM- (TN) |
| #1                   | 7.6   | 29.3  | 62.9 | 53.3      | 46.7      |
| #2                   | 6.1   | 23.4  | 70.3 | 52.8      | 47.2      |
| #3                   | 6.5   | 22.0  | 71.4 | 59.8      | 40.2      |
| #4                   | 5.7   | 20.2  | 74.0 | 56.0      | 44.0      |

(b)

| % in lymphocyte gate | CD8SP      | CD4SP       | IgMSP       | TN          |
|----------------------|------------|-------------|-------------|-------------|
| #1                   | 7.6        | 29.3        | 33.5        | 29.4        |
| #2                   | 6.1        | 23.4        | 37.1        | 33.2        |
| #3                   | 6.5        | 22.0        | 42.7        | 28.7        |
| #4                   | 5.7        | 20.2        | 41.4        | 32.6        |
| Av.                  | <b>6.5</b> | <b>23.7</b> | <b>38.7</b> | <b>31.0</b> |

## References used in this file

1. Lieschke GJ, Trede NS. Fish immunology. *Curr Biol.* (2009) 19:16:R678–82. doi: 10.1016/j.cub.2009.06.068
2. Zapata A. Lymphoid organs of teleost fish. I. Ultrastructure of the thymus of *Rutilus rutilus*. *Dev Comp Immunol.* (1981) 5:427–36. doi: 10.1016/S0145-305X(81)80055-9
3. Zapata A. Lymphoid organs of teleost fish. III. Splenic lymphoid tissue of *Rutilus rutilus* and *Gobio gobio*. *Dev Comp Immunol.* (1982) 6:87–94. doi: 10.1016/0145-305X(82)90010-6
4. Press CM, Evensen Ø. The morphology of the immune system in teleost fishes. *Fish Shellfish Immunol.* (1999) 9:309–18. doi: 10.1006/fsim.1998.0181
5. Bowden TJ, Cook P, Rombout JHWM. Development and function of the thymus in teleosts. *Fish Shellfish Immunol.* (2005) 19:413–27. doi: 10.1016/j.fsi.2005.02.003
6. Koppang EO, Fischer U, Moore L, Tranulis MA, Dijkstra JM, Köllner B, et al. Salmonid T cells assemble in the thymus, spleen and in novel interbranchial lymphoid tissue. *J Anat.* (2010) 217:728–39. doi: 10.1111/j.1469-7580.2010.01305.x
7. Kobayashi I, Sekiya M, Moritomo T, Ototake M, Nakanishi T. Demonstration of hematopoietic stem cells in ginbuna carp (*Carassius auratus langsdorfii*) kidney. *Dev Comp Immunol.* (2006) 30:1034–46. doi: 10.1016/j.dci.2006.01.005
8. Kobayashi I, Saito K, Moritomo T, Araki K, Takizawa F, Nakanishi T. Characterization and localization of side population (SP) cells in zebrafish kidney hematopoietic tissue. *Blood.* (2008) 111:1131–7. doi: 10.1182/blood-2007-08-104299
9. Rombout JH, Abelli L, Picchietti S, Scapigliati G, Kiron V. Teleost intestinal immunology. *Fish Shellfish Immunol.* (2011) 31:616–26. doi: 10.1016/j.fsi.2010.09.001
10. Takizawa F, Dijkstra JM, Kotterba P, Korytár T, Kock H, Köllner B, et al. The expression of CD8a discriminates distinct T cell subsets in teleost fish. *Dev Comp Immunol.* (2011) 35:752–63. doi: 10.1016/j.dci.2011.02.008
11. Somamoto T, Koppang EO, Fischer U. Antiviral functions of CD8(+) cytotoxic T cells in teleost fish. *Dev Comp Immunol.* (2014) 43:197–204. doi: 10.1016/j.dci.2013.07.014
12. Hayashi N, Takeuchi M, Nakanishi T, Hashimoto K, Dijkstra JM. Zinc-dependent binding between peptides derived from rainbow trout CD8alpha LCK. *Fish Shellfish Immunol.* (2010) 28:72–6. doi: 10.1016/j.fsi.2009.09.020

13. Chang YT, Kai YH, Chi SC, Song YL. Cytotoxic CD8a<sup>+</sup> leucocytes have heterogeneous features in antigen recognition and class I MHC restriction in grouper. *Fish Shellfish Immunol.* (2011) 30:1283–93. doi: 10.1016/j.fsi.2011.03.018
14. Takizawa F, Magadan S, Parra D, Xu Z, Korytár T, Boudinot P, et al. Novel teleost CD4-Bearing cell populations provide insights into the evolutionary origins and primordial roles of CD4<sup>+</sup>lymphocytes and CD4<sup>+</sup>macrophages. *J Immunol.* (2016) 196:4522–35. doi: 10.4049/jimmunol.1600222
15. Suetake H, Araki K, Suzuki Y. Cloning, expression, and characterization of fugu CD4, the first ectothermic animal CD4. *Immunogenetics.* (2004) 56:368–74. doi: 10.1007/s00251-004-0694-x
16. Dijkstra JM, Somamoto T, Moore L, Hordvik I, Ototake M, Fischer U. Identification and characterization of a second CD4-like gene in teleost fish. *Mol Immunol.* (2006) 43:410–9. doi: 10.1016/j.molimm.2005.03.005
17. Dee CT, Nagaraju RT, Athanasiadis EI, Gray C, del Ama LF, Johnston SA, et al. CD4-transgenic zebrafish reveal tissue-resident Th2- and regulatory T cell-like populations and diverse mononuclear phagocytes. *J Immunol.* (2016) 197:3520–30. doi: 10.4049/jimmunol.1600959
18. Wen Y, Fang W, Xiang LX, Pan RL, Shao JZ. Identification of Treg-like cells in Tetraodon: insight into the origin of regulatory T subsets during early vertebrate evolution. *Cell Mol Life Sci.* (2011) 68:2615–26. doi: 10.1007/s00018-010-0574-5
19. Yamaguchi T, Takizawa F, Fischer U, Dijkstra JM. Along the axis between type 1 and type 2 immunity; principles conserved in evolution from fish to mammals. *Biology (Basel).* (2015) 4:814–59. doi: 10.3390/biology4040814
20. Somamoto T, Kondo M, Nakanishi T, Nakao M. Helper function of CD4<sup>+</sup> lymphocytes in antiviral immunity in ginbuna crucian carp, *Carassius auratus langsdorfii*. *Dev Comp Immunol.* (2014) 44:111–5. doi: 10.1016/j.dci.2013.12.008
21. Taylor EB, Wilson M, Bengten E. The Src tyrosine kinase Lck binds to CD2, CD4-1, and CD4-2 T cell co-receptors in channel catfish, *Ictalurus punctatus*. *Mol Immunol.* (2015) 66:126–38. doi: 10.1016/j.molimm.2015.02.023
22. Flajnik MF. The last flag unfurled? a new immunoglobulin isotype in fish expressed in early development. *Nat Immunol.* (2005) 6:229–30. doi: 10.1038/ni0305-229
23. Clausen J, Vergeiner B, Enk M, Petzer AL, Gastl G, Gunsilius E. Functional significance of the activation-associated receptors CD25 and CD69 on human NK-cells and NK-like T-cells. *Immunobiology.* (2003) 207:85–93. doi: 10.1078/0171-2985-00219

24. DeLuca D, Wilson M, Warr GW. Lymphocyte heterogeneity in the trout, *salmo gairdneri*, defined with monoclonal antibodies to IgM. *Eur J Immunol.* (1983) 13:546–51. doi: 10.1002/eji.1830130706
25. Köllner B, Fischer U, Rombout JH, Taverne-Thiele JJ, Hansen JD. Potential involvement of rainbow trout thrombocytes in immune functions: a study using a panel of monoclonal antibodies RT-PCR. *Dev Comp Immunol.* (2004) 28:1049–62. doi: 10.1016/j.dci.2004.03.005
